# Supplementary material for: OsWOX3A is involved in negative feedback regulation of the gibberellic acid biosynthetic pathway in rice (Oryza sativa)
Source: PubMed Central journal article supplement (PMC4783357; doi:10.1093/jxb/erv559), 2016-01-14
Supplement: supp_erv559_supplementary_figures_S1_S6_table_S1.pdf [file supp_erv559_supplementary_figures_S1_S6_table_S1.pdf]

## **Supplementary Information (SI) Appendix**

# **OsWOX3A is involved in negative feedback regulation of the gibberellic acid biosynthetic pathway in rice**

Sung-Hwan Cho, Kiyoon Kang, Sang-Hwa Lee, In-Jung Lee and Nam-Chon Paek\*

\*Author for correspondence: [ncpaek@snu.ac.kr](mailto:ncpaek@snu.ac.kr)

### **Supplementary Information (SI) contains:**

SI Figures 1-6

SI Table 1

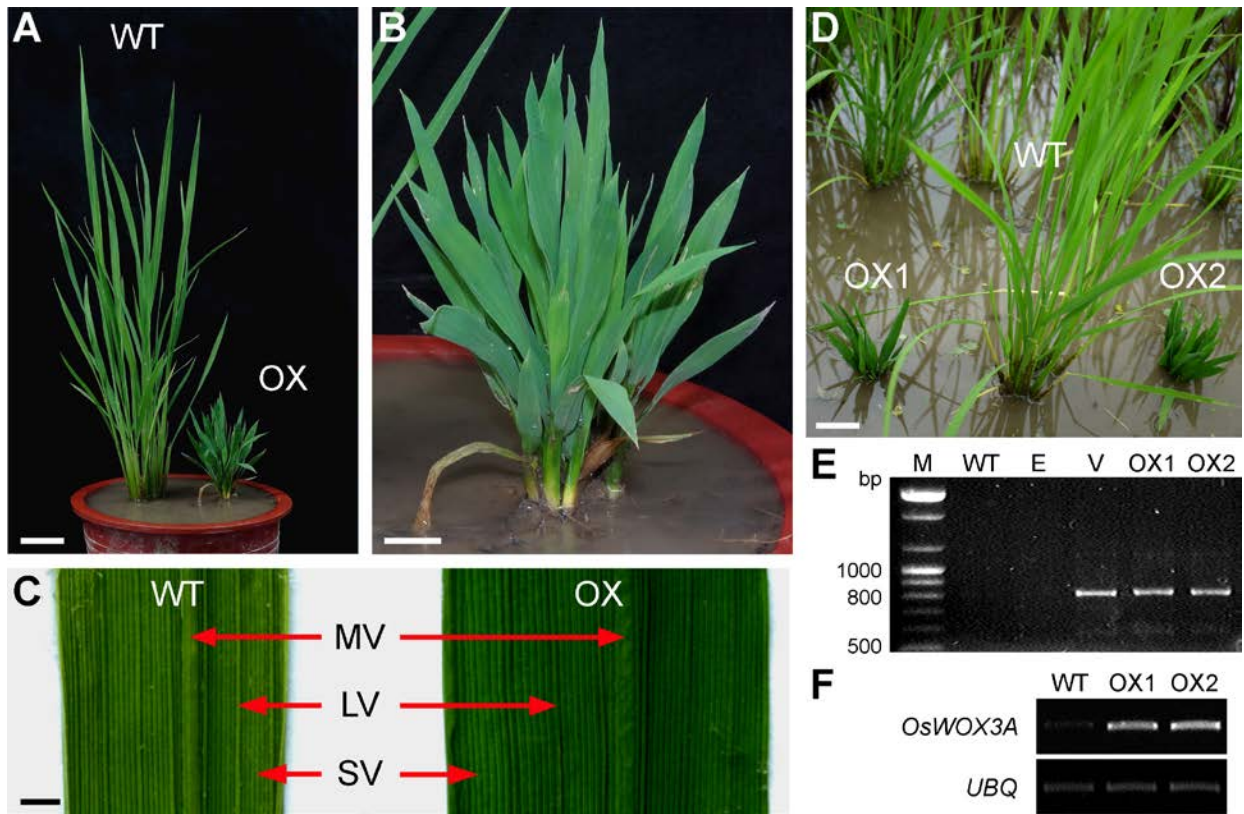

**Supplementary Fig. 1.** Phenotypic characteristics of *OsWOX3A*-OX (OX) plants.

(A) The 3-month-old wild-type (WT) and OX plants.

(B) Magnified view of OX plant in (A).

(C) Adaxial sides of leaf blades.

(D) The 3-month-old WT and plants from two independent transgenic lines (OX1 and OX2) in the paddy field.

(E) Verification of 2 independent transgenic lines. Genomic DNA was extracted, and an 805-bp PCR product for *OsWOX3A* inside the 2 x 35S promoter region of pMDC32 was amplified.

(F) RT-PCR analysis of *OsWOX3A* overexpression in two transgenic lines (OX1, OX2). MV, midrib vein; LV, large vein; SV, small vein; M, DNA marker; E, empty plasmid of pMDC32 as negative control; V, recombinant plasmid of pMDC32-WOX3A as positive control.

Scale bars = 4 cm (A, D), 2 cm (B), 2 mm (C)

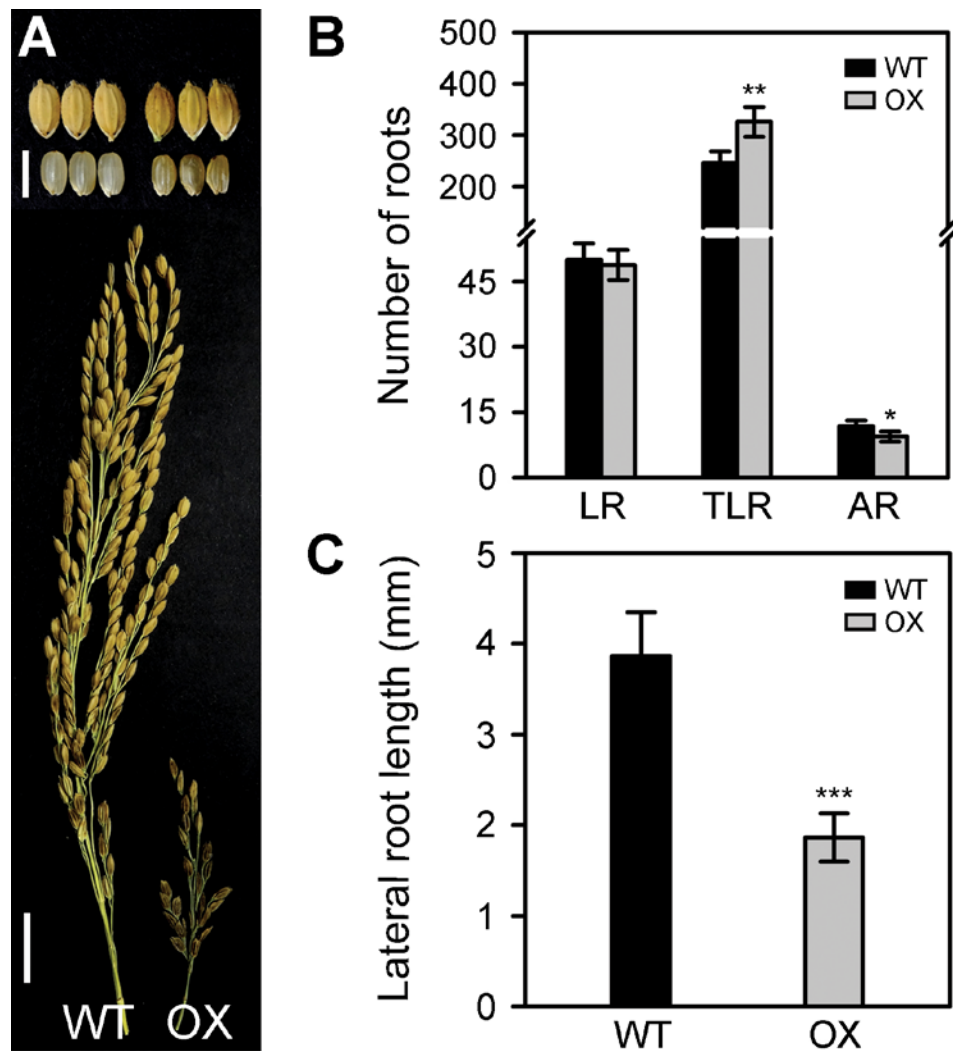

**Supplementary Fig. 2.** Multiple developmental defects in *OsWOX3A-OX* (OX) plants.

(A) Comparison of spikelet, grain, and panicle shapes between wild-type (WT) and OX plants.

(B) Lateral root (LR), total lateral root (TLR), and adventitious root (AR) number. The LR number within 1.5 cm-length of primary root, TLR number per plant, and AR number per plant were counted with 10-day-old seedlings.

(C) LR lengths in (B). (B, C) Data are means  $\pm$  SD from 10 plants. Significant difference was determined by Student's *t*-test (\* $P < 0.05$ , \*\* $P < 0.01$ , \*\*\* $P < 0.001$ ).

Scale bars = 5 mm (top, A), 3 cm (bottom, A).

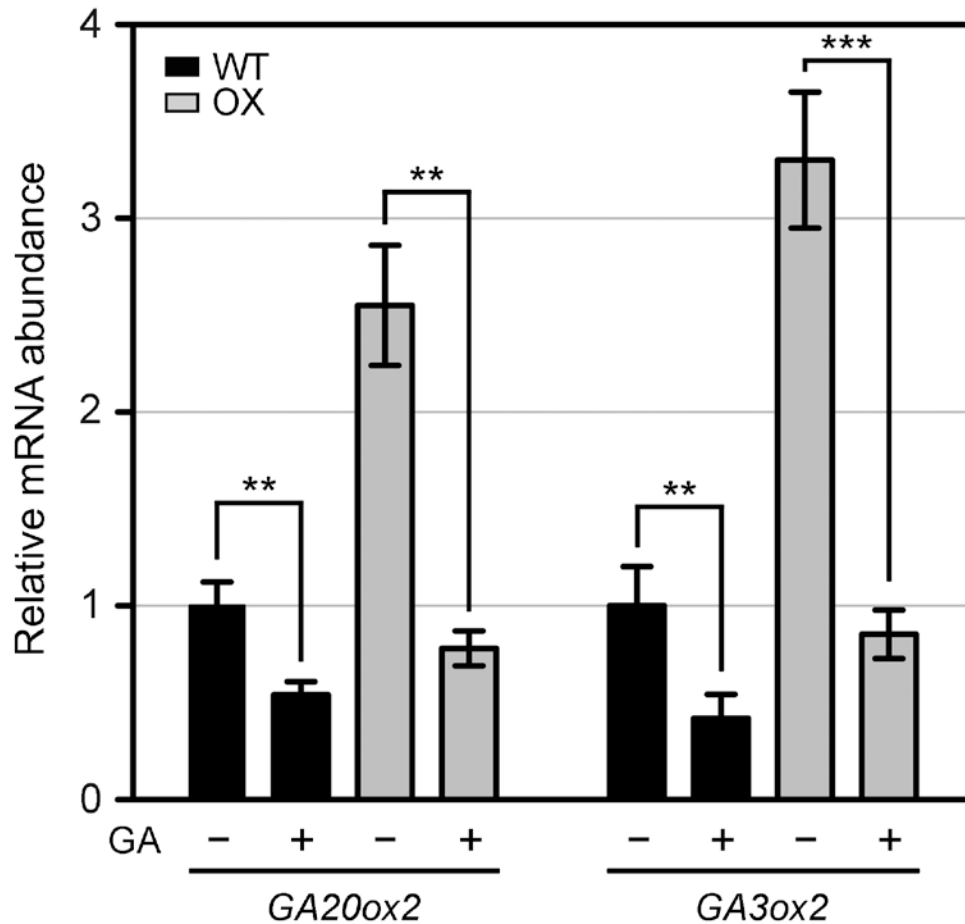

**Supplementary Fig. 3.** Effect of exogenous GA<sub>3</sub> treatment on the relative expression of *GA20ox2* and *GA3ox2* in 4-week-old wild type (WT) and *OsWOX3A-OX* (OX) plants. By RT-qPCR, relative mRNA levels of each gene are normalized to the mRNA levels of *Ub5* (Os01g0328400). Expression levels of *GA20ox2* and *GA3ox2* after GA treatment (+) are shown relative to those before GA treatment (-) in plants, which is set as 1. Data are means ± SD from three biological repeats. Significant difference was determined by Student's *t*-test (\*\*P < 0.01, \*\*\*P < 0.001).

These experiments were repeated more than twice with similar results.

AACAGACAGACAGACTTTATAGCAACATCTAGCAGCAGCAGTAACATCTGTTAGTGTTGACCACCGTCCCCCCCC  
CCCCCCCCCCCCCAATGCAACCCACAGTGACAAAGGCACAACCCTACCAATGCTTTCTTCTTCCTCCTCCTCTC  
TGATTACAGTTACATGAACAGTTAAATTTGTTGAGCTTTGCTCACTGCTGCAGGTGATCCCGATCAGTACTAGTAC  
TAATTTCTACAGTATGTCTGTCTGACGATGAATGCAGGGTTGCAGACAGACGGACAGCATCTTTTCATCTTCAGT  
GTTCTGCACTCTGAATCTCTGACACTGCCTGTGATCCGTGCGAGAGTCTGTCACTCTCGCTCGTCTGATCAGTGA  
TCACCACACTCTGCAATCTGTGGGCTGTGTACCCCATATCTTTTCTAGGATTAGCTTTATGGACTATATATATAT  
ATATGTGTGTTTCTCAAAAAGAAATTTCAAGGGGACCCGGCTAGAAAAGAAAGAAAGAGATCCTGCCTGCACTAGT  
AGTAGTAGCTTTATTATCGTGTGCAATGTCATCCTCTCTCTCTCTCTCTCAACTCTGAACTGATCTTCTC  
GAATATCTCCATAATTCAGAATGGAGAGGCTTCAACCAGAGATGATCATGTTTGGTATGGTGTCCACAGTTAGTAA  
AGTCTGCAAAAAAATAAAAAGGGAGAATCTTTTTTTTTTTCAGATTGTAATACATACCTTCTCTATTATGTAA  
AAAATGGTAGTATGTTTTACTAATGGACAGCATTATCTTAGGGATGCATGCATGGTTTACTCCTTAAACTGACT  
AACTAATCTTATCGATCTTATCTTCTCACTGGGGAATCTTCTTCTTTTTTCTTTAACTAAACAAGTGGAGAATG  
GTTGGATGGTCCAGAAAATCAGAACAGATAGCATGCGCATGCCAATGATCCTATCCTCATTCTTATCTGTA  
GCATGGATAGTAACATGTGGAAGAAGAAGGAATAAATAAACCAGTTGCTCCTCCTAAATCATTACTAAATTTAGGC  
GAATGCATGCATGCGCTGCTTAATTAAGCCAGCCAAAATGGTAAAAGCTTTAGTACCAATCCACATGAGGTAGTA  
ATTAGTCAATCAAACATTCATTCAATTTAGGATCCACCATCCACCATCTCGATCAGGAACAAAACCTGATGACTACC  
ACAGATATATATATATATATATATATATATATATATAGCATATAGCTCATCTTTTTTTTTTACCAGAATATGAAAAATTCAGT  
ACAGTCTATACGCAAGTAAAAATTAATAATGTTTTCTTTTATAGCTTTATGATTTTTTTTTTACAGAAGAACCAATCT  
GAATGATTATTTTAAAGATATTAGAAGCTTTAATAACTCAACGTGATACGAGTTGGATGAAATAGACCGTGC  
AACTACTAGCTAGAAGAGATACGTAATATATCCATGTGTGGCCATGTAAATGGAGTCGTTGCTACATACAAAATA  
ATTGAGCTAGATACATATGGAGAGCAAAACCATGGTAATCAGTTTTGCATTTTCGATCACTGGAATTGATGGACT  
GTGTTGTTAATAAGCTAGGGTACAAGAAAAGCCGGCGATAAATTAGATGGATCGAAACCAACCACAAGAGTCCA  
AAGAAGAAAGTACAAAGGATCTCTGGACATGCTCACGATGAATAATCCCATCGATCGAGCTACTATACATACAAA  
ACTCACTACTAGTAAATAAGTGTGAGGGTTCGAGAACAAAATAATTAATCGCCAAAATAATGCATCACAAACATC  
ATCAACCTAGTTATCGGTTTCTTTTTTAAATCGAGAACATCTTGATTAATTTATGTAAAGCCCTTTTTGTCTCT  
CGAAAAAAGCTAAGCACGCATTTTTTTCCGCGTAAAATAAATTAGAGAAATAAATAAATAAAGGAGGG  
AATTGGGCAGTCGCCAGGTATATATTGAGAGGGAGGAGCTTAGCATTTGGCGACACTCGTCTCTGCGTGCCTT  
CGTTCCTTCGTTGCGTTGCGTTGGTTCATCGATAGATCGTTCTCGATG

**Supplemental Fig. 4.** Analysis of OsWOX3A-binding motifs in the promoter of *KAO*. The 2-kb promoter region of *KAO* upstream sequences was obtained from the NCBI database. The OsWOX3A-binding sites are shown in red (TTAATCG). The other previously reported binding elements for WOX13 are shown in blue (CAAT) and orange (TTAA). The probe of W3 is shown as underlined sequences (see Fig. 6A). ATG (bold letters) at the end indicates the start codon of *KAO*.

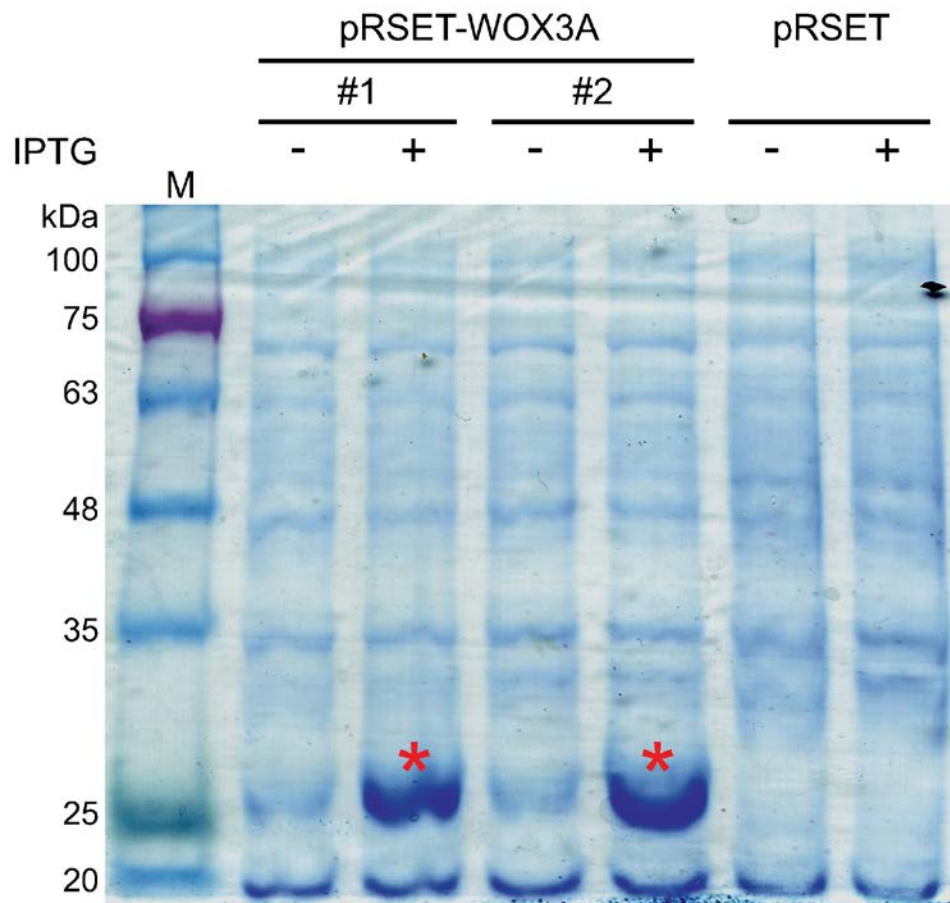

**Supplementary Fig. 5.** Expression of recombinant OsWOX3A fusion protein in *E. coli*. Recombinant His-OsWOX3A fusion protein was produced by BL21 *E. coli* after 3 h incubation with 1 mM IPTG. Bacterial pellet was collected, resuspended in 100  $\mu$ l PBS buffer and subjected to freeze–thaw cycles four times. An equal volume of 2x SDS-polyacrylamide gel electrophoresis sample buffer was added to the supernatant. A total of 25  $\mu$ l of each sample was loaded on SDS-PAGE and stained with Coomassie brilliant blue. A total of 28 kDa His-OsWOX3A fusion protein including tags was detected after the IPTG induction. M, protein size marker. Red asterisks indicate recombinant His-OsWOX3A fusion protein.

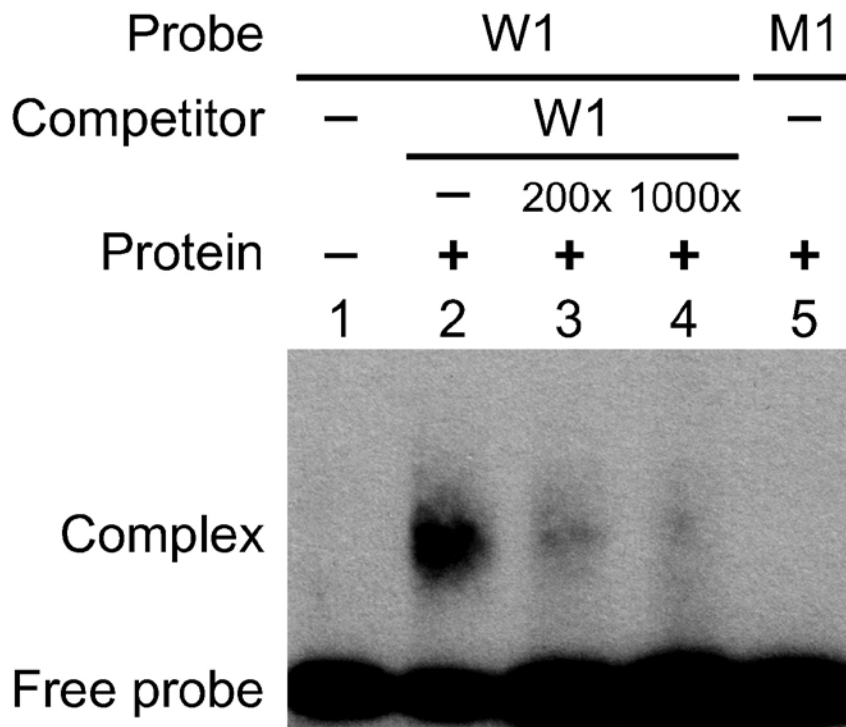

**Supplementary Fig. 6.** OsWOX3A does not bind to the M1 promoter region of *KAO*. EMSA using the His-OsWOX3A fusion protein with W1 and M1 probes. Oligonucleotides containing W1 (the *KAO* promoter binding site) and M1 (deleted *KAO* promoter binding site version of W1), were used as the biotin-labeled probes. Negative control is indicated in Lane 1. W1 was used as the unlabeled competitor. The (+) presence or (-) absence of His-OsWOX3A fusion protein is indicated. These experiments were repeated more than three times with similar results



**Supplementary Table 1.** Primers used in this study. Underlined sequences are restriction enzyme sequences.

| <b>Product</b>                                         | <b>Sequence ( 5' → 3' )</b>    |
|--------------------------------------------------------|--------------------------------|
| <b>Cloning &amp; confirmation of transgenic plants</b> |                                |
| 35STC-F                                                | ATTGCCCAGCTATCTGTCACCTT        |
| TC-R                                                   | ATCGCCATGTCAGCAGCAGTT          |
| OsWOX3A-F                                              | ATGCCTCAGACCCCTTCGACGCGGTGGT   |
| OsWOX3A-R                                              | TTAATTGGTGGAGGTGGAGCAAGAGGAGGA |
| <b>RT-qPCR analysis</b>                                |                                |
| OsWOX3A-sRT-F                                          | GCAACTGCTGCTGACATGGC           |
| OsWOX3A-sRT-R                                          | AAGAGGAGGACTTGGAGCTGC          |
| CPS1-Real-F                                            | GCGTGCATTTTCGAACCAA            |
| CPS1-Real-R                                            | TTGGCCAGCACTGACACTCT           |
| KO1-Real-F                                             | AGTAGCCAAGGAGGCGATGA           |
| KO1-Real-R                                             | CGGCTTATCACAGACAATGCT          |
| KO2-Real-F                                             | TGAAGTAGCCAAGGAGGCGA           |
| KO2-Real-R                                             | CGCTGATTGCGACCATACTTT          |
| KAO-Real-F                                             | CGCAAGAGCAAAGGCTGAG            |
| KAO-Real-R                                             | CCTGTGAGAGGAAGTGCATCTTCT       |
| GA20ox2-F                                              | GGGAGGGTGTACCAGAAGTACTG        |
| GA20ox2-R                                              | GGCTCAGCTCCAGGAGTTCC           |



|                               |                                         |
|-------------------------------|-----------------------------------------|
| GA3ox2-F                      | TCTTCTCCAAGCTCATGTGGT                   |
| GA3ox2-R                      | AACTCCTCCATCACGTCACAG                   |
| GA2ox1-F                      | TGACGATGATGACAGCGACAA                   |
| GA2ox1-R                      | CCATAGGCATCGTCTGCAATT                   |
| GA2ox3-F                      | TGGTGGCCAACAGCCTAAAG                    |
| GA2ox3-R                      | TGGTGCAATCCTCTGTGCTAAC                  |
| PIN1b-F                       | TTCTGCACATTGCCATTGTT                    |
| PIN1b-R                       | AATGTGATGGGGAGAGCAAT                    |
| PIN1c-F                       | ATCGTGCAGGCAGCGTTGCC                    |
| PIN1c-R                       | ATGTAGTACACCAGCGTGAT                    |
| PIN2-F                        | TGTCAGATGCAGGGCTAGGAA                   |
| PIN2-R                        | TGCCACAAGAAATGATCTTTGG                  |
| Actin-F                       | TGCTATGTACGTCGCCATCCAG                  |
| Actin-R                       | AATGAGTAACCACGCTCCGTCA                  |
| Ub5-F                         | GTCTGATCTTCGCTGGCAAGCAGC                |
| Ub5-R                         | GCATACTGCTGTCCCACAGGAACTG               |
| <b>Yeast one-hybrid assay</b> |                                         |
| CPS1_pro-F                    | <u>GAATTC</u> TTTATGTCAAATCTTAATGCAA    |
| CPS1_pro-R                    | <u>GTCGACT</u> ATAGCCCACTTCCCTCGCCAT    |
| KO2_pro-F                     | <u>AAGCTT</u> ATTATTA AAAATTGATCGGGCCTT |
| KO2_pro-R                     | <u>CTCGAGT</u> TAATCTTCTTTCTTCTTTCAAACA |

|                 |                                                                               |
|-----------------|-------------------------------------------------------------------------------|
| pro-KAO-W2-F    | <u>GGTACCA</u> AAAAATGGTAGTATGTTTTA                                           |
| pro-KAO-W2-R    | <u>GTCGACA</u> ACCGATAACTAGGTTGATG                                            |
| pro-KAO-M2-F    | <u>GGTACCA</u> AAAAATGGTAGTATGTTTTA                                           |
| pro-KAO-M2-R    | <u>GTCGACA</u> ACCGATAACTAGGTTGATGATGTTTGTGATGCATT<br>ATTTGGTTAATTTGTTCTCGAAC |
| pro-KAO-W4-F    | <u>GGTACCTT</u> ACGGTCACTTGCATGCCTT                                           |
| pro-KAO-W4-R    | <u>GTCGACT</u> AAAACATACTACCATTTTTTACAT                                       |
| GA3ox2_pro-F    | <u>AAGCTT</u> AGTGTGTTGCTCTCTGGTCAT                                           |
| GA3ox2_pro-R    | <u>GAGCTC</u> ATGACCAGAGAGCAACACACT                                           |
| GA20ox2_pro-F   | <u>AAGCTTT</u> AGTTTAGGCGATCGCTTAGAT                                          |
| GA20ox2_pro-R   | <u>CTCGAGT</u> GTGAGTGTGAGTGTGTGTGTGTG                                        |
| GA2ox1_pro-F    | <u>GAATTC</u> ACAACACTAGATCGTGTAGCGATTAA                                      |
| GA2ox1_pro-R    | <u>CTCGAGC</u> ATGTGTCAAGCAAGCCACAAATCT                                       |
| GA2ox3_pro-F    | <u>AAGCTTT</u> GAAATGCTGAAATTCACCATACGT                                       |
| GA2ox3_pro-R    | <u>GTCGAC</u> CTTTATCTGGTGGTGGCAATGGA                                         |
| OsWOX3A-BamH1-F | <u>GGATCC</u> ATGCCTCAGACCCCTTCGACGCGGTGGT                                    |
| OsWOX3A-Sal1-R  | <u>GTCGACTT</u> AATTGGTGGAGGTGGAGCAAGAGGAGGA                                  |
| <b>EMSA</b>     |                                                                               |
| KO2-1-F         | ATTATTA AAAAATTGATCGGGCCTT                                                    |
| KO2-1-R         | CTCAAAGAATTTACGTCAGTT                                                         |
| KO2-3-F         | GAGGTAGCTGCTACACGTGTT                                                         |
| KO2-3-R         | TCAAACACACTAGAATAATAAGT                                                       |

|                 |                                              |
|-----------------|----------------------------------------------|
| KO2-1-DEL-F     | ATTAAATTGATCGGGCCAAAACATCATGG                |
| KO2-1-DEL-R     | CTCAAAGAATTTACGTCAGTT                        |
| KAO-W1-F        | TACAAAACACTACTACTAGTA                        |
| KAO-W1-R        | AACCGATAACTAGGTTGATG                         |
| KAO-M1-F        | TACAAAACACTACTACTAGTA                        |
| KAO-M1-R        | GATGATGTTTGTGATGCATTATTTGGTTAATTTGTT         |
| KAO-W3-F        | AAGCCAGCCAAAATGGTAAAA                        |
| KAO-W3-R        | AAACTGATGACTACCACAGA                         |
| OsWOX3A-BamH1-F | <u>GGATCC</u> ATGCCTCAGACCCCTTCGACGCGGTGGT   |
| OsWOX3A-EcoR1-R | <u>GAATTC</u> TTAATTGGTGGAGGTGGAGCAAGAGGAGGA |
